# Supplementary material
Source: MDPI journal article supplement (https://www.mdpi.com/2304-6740/7/2/19)
Supplement: s1 [file s1]

# **Supporting Information:**

## **A simple model for halogen bond interaction energies**

Robert A. Shaw\* and J. Grant Hill\*

*Department of Chemistry, University of Sheffield, Sheffield S3 7HF, U.K.*

E-mail: rashaw1@sheffield.ac.uk; grant.hill@sheffield.ac.uk

### **Contents**

|          |                                    |             |
|----------|------------------------------------|-------------|
| <b>1</b> | <b>Additional files</b>            | <b>S-2</b>  |
| <b>2</b> | <b>Model parameters</b>            | <b>S-3</b>  |
| <b>3</b> | <b>Benchmark data</b>              | <b>S-5</b>  |
| <b>4</b> | <b>DFT results for all systems</b> | <b>S-12</b> |
| <b>5</b> | <b>Additional figures</b>          | <b>S-21</b> |

# 1 Additional files

The supporting information for this paper also includes Cartesian coordinates of the geometries for all complexes calculated at the CCSD(T)-F12b/VTZ-(PP)-F12 level. These can be found in xyz\_files.zip, and are labelled as donor-acceptor.xyz. In addition to this, all data including energies, separations, and SAPT energy decompositions can be found in CSV format in the datasets folder.

## 2 Model parameters

Table S1: Parameters for all molecules in the fitting and validation sets, as fitted to the Linear ( $c + X_i + B_j$ ) and  $Pn$  ( $cX_iB_j/R_{ij}^n$ ) models for  $n = 0$  and 4, plus the second components additional to  $P0$  for the fitting set. The parameters for the Linear model have units kcal mol<sup>-1</sup>, while those for the  $Pn$  models are dimensionless.

|                               | Model   |                  |                  |                          |
|-------------------------------|---------|------------------|------------------|--------------------------|
|                               | Linear  | $P0$ (1st comp.) | $P0$ (2nd comp.) | $P4$                     |
| $c$ / kcal mol <sup>-1</sup>  | -10.638 | 59.0032          | 2.0114           | 3327.9474 Å <sup>4</sup> |
| Halogen bond donors ( $X_i$ ) |         |                  |                  |                          |
| Br <sub>2</sub>               | 6.902   | 0.2193           | 0.0008           | 0.2461                   |
| I <sub>2</sub>                | 6.633   | 0.2298           | 0.1685           | 0.3254                   |
| BrI                           | 4.854   | 0.3075           | 0.1092           | 0.3682                   |
| ClBr                          | 5.749   | 0.2699           | -0.0181          | 0.2707                   |
| ClI                           | 3.630   | 0.3601           | 0.1637           | 0.3974                   |
| HBr                           | 10.116  | 0.0767           | 0.3269           | 0.1709                   |
| HI                            | 9.251   | 0.1132           | 0.4858           | 0.2560                   |
| FCI                           | 4.822   | 0.3148           | -0.5345          | 0.2215                   |
| FBr                           | 1.199   | 0.4688           | -0.4426          | 0.3306                   |
| FI                            | 1.129   | 0.5143           | 0.3288           | 0.4600                   |
| F <sub>2</sub>                | —       | 0.0654           | —                | 0.0621                   |
| Cl <sub>2</sub>               | —       | 0.1560           | —                | 0.1845                   |
| CF <sub>3</sub> Cl            | —       | 0.1145           | —                | 0.1651                   |
| CF <sub>3</sub> Br            | —       | 0.1607           | —                | 0.2336                   |
| CF <sub>3</sub> I             | —       | 0.2132           | —                | 0.3343                   |
| Lewis bases ( $B_j$ )         |         |                  |                  |                          |
| H <sub>2</sub> O              | 0.060   | -0.3062          | -0.4056          | -0.2947                  |
| CH <sub>2</sub> O             | -0.435  | -0.3323          | -0.5090          | -0.3056                  |
| HCN                           | 0.338   | -0.2942          | -0.4518          | -0.3050                  |
| CH <sub>2</sub> S             | -0.298  | -0.4948          | 0.5020           | -0.5623                  |
| H <sub>3</sub> N              | -3.028  | -0.6034          | 0.3373           | -0.4416                  |
| H <sub>2</sub> S              | -4.871  | -0.3169          | -0.0810          | -0.4643                  |
| CH <sub>3</sub> OH            | —       | -0.4110          | —                | -0.3749                  |
| C <sub>2</sub> H <sub>4</sub> | —       | -0.2991          | —                | -0.4215                  |
| PH <sub>3</sub>               | —       | -0.4340          | —                | -0.5713                  |
| Oxirane                       | —       | -0.4500          | —                | -0.3883                  |
| Thiirane                      | —       | -0.6169          | —                | -0.7500                  |

### 3 Benchmark data

Table S2: Benchmark interaction energies and intermolecular separations for all complexes in the fitting set, calculated at the CCSD(T)-F12b level, using VnZ-(PP)-F12 basis sets with  $n = \text{T, Q}$ , then extrapolated to the complete basis set (CBS) limit.

| Donor           | Acceptor          | Interaction energy (kcal/mol) |          |          | $R$ (Å) |
|-----------------|-------------------|-------------------------------|----------|----------|---------|
|                 |                   | TZ                            | QZ       | CBS      |         |
| Br <sub>2</sub> | H <sub>2</sub> O  | -3.8419                       | -3.9210  | -3.9921  | 2.7918  |
| Br <sub>2</sub> | CH <sub>2</sub> O | -4.2728                       | -4.3744  | -4.4417  | 2.7498  |
| Br <sub>2</sub> | HCN               | -3.5401                       | -3.6164  | -3.6564  | 2.8888  |
| Br <sub>2</sub> | CH <sub>2</sub> S | -6.1036                       | -6.3054  | -6.4191  | 2.9106  |
| Br <sub>2</sub> | H <sub>3</sub> N  | -7.5249                       | -7.7032  | -7.8103  | 2.5978  |
| Br <sub>2</sub> | H <sub>2</sub> S  | -3.8056                       | -3.9349  | -4.0340  | 3.1139  |
| BrI             | H <sub>2</sub> O  | -5.4232                       | -5.5715  | -5.6662  | 2.8270  |
| BrI             | CH <sub>2</sub> O | -5.8785                       | -6.0623  | -6.1818  | 2.7870  |
| BrI             | HCN               | -5.1428                       | -5.2901  | -5.3502  | 2.9059  |
| BrI             | CH <sub>2</sub> S | -8.2224                       | -8.5285  | -8.7127  | 2.9786  |
| BrI             | H <sub>3</sub> N  | -10.6429                      | -10.9145 | -11.0522 | 2.6468  |
| BrI             | H <sub>2</sub> S  | -5.2709                       | -5.4977  | -5.6757  | 3.1616  |
| ClBr            | H <sub>2</sub> O  | -4.6916                       | -4.7942  | -4.8878  | 2.7210  |
| ClBr            | CH <sub>2</sub> O | -5.1168                       | -5.2433  | -5.3495  | 2.6806  |
| ClBr            | HCN               | -4.3855                       | -4.4841  | -4.5602  | 2.8043  |
| ClBr            | CH <sub>2</sub> S | -7.3457                       | -7.5954  | -7.7604  | 2.8393  |
| ClBr            | H <sub>3</sub> N  | -9.8411                       | -9.5377  | -9.7964  | 2.5147  |
| ClBr            | H <sub>2</sub> S  | -4.6112                       | -4.7727  | -4.9153  | 3.0396  |
| ClI             | H <sub>2</sub> O  | -6.3655                       | -6.5372  | -6.6436  | 2.7691  |
| ClI             | CH <sub>2</sub> O | -6.8421                       | -7.0511  | -7.1863  | 2.7284  |

| Interaction energy (kcal/mol) |                   |          |          |          |         |
|-------------------------------|-------------------|----------|----------|----------|---------|
| Donor                         | Acceptor          | TZ       | QZ       | CBS      | $R$ (Å) |
| CII                           | HCN               | -6.1381  | -6.3114  | -6.4094  | 2.8244  |
| CII                           | CH <sub>2</sub> S | -9.5909  | -9.9361  | -10.1441 | 2.9202  |
| CII                           | H <sub>3</sub> N  | -12.1499 | -12.7710 | -12.9422 | 2.5984  |
| CII                           | H <sub>2</sub> S  | -6.2173  | -6.4724  | -6.6566  | 3.1017  |
| FBr                           | H <sub>2</sub> O  | -7.7928  | -7.9483  | -8.0540  | 2.5098  |
| FBr                           | CH <sub>2</sub> O | -8.3791  | -8.5617  | -8.6728  | 2.4727  |
| FBr                           | HCN               | -7.5666  | -7.7198  | -7.7957  | 2.5351  |
| FBr                           | CH <sub>2</sub> S | -13.7768 | -14.1416 | -14.3436 | 2.5672  |
| FBr                           | H <sub>3</sub> N  | -16.2278 | -16.5119 | -16.6741 | 2.3288  |
| FBr                           | H <sub>2</sub> S  | -8.6066  | -8.8705  | -9.0320  | 2.7558  |
| FCI                           | H <sub>2</sub> O  | -5.1525  | -5.2673  | -5.3642  | 2.5436  |
| FCI                           | CH <sub>2</sub> O | -5.6393  | -5.7812  | -5.8504  | 2.5009  |
| FCI                           | HCN               | -4.6893  | -4.7895  | -4.8186  | 2.6361  |
| FCI                           | CH <sub>2</sub> S | -9.2779  | -9.6040  | -9.7814  | 2.5432  |
| FCI                           | H <sub>3</sub> N  | -11.2460 | -11.5080 | -11.6510 | 2.2979  |
| FCI                           | H <sub>2</sub> S  | -5.0616  | -5.2499  | -5.3684  | 2.8153  |
| FI                            | H <sub>2</sub> O  | -9.1483  | -9.3364  | -9.4488  | 2.6238  |
| FI                            | CH <sub>2</sub> O | -9.7722  | -9.9998  | -10.1249 | 2.5856  |
| FI                            | HCN               | -9.2663  | -9.4621  | -9.5521  | 2.6203  |
| FI                            | CH <sub>2</sub> S | -14.1216 | -14.4855 | -14.7128 | 2.7601  |
| FI                            | H <sub>3</sub> N  | -17.5111 | -17.7972 | -17.9678 | 2.4910  |
| FI                            | H <sub>2</sub> S  | -9.4824  | -9.7728  | -9.9585  | 2.9236  |
| HBr                           | H <sub>2</sub> O  | -1.6186  | -1.6472  | -1.6863  | 3.1170  |
| HBr                           | CH <sub>2</sub> O | -2.0259  | -2.0761  | -2.1098  | 3.1073  |

| Interaction energy (kcal/mol) |                   |         |         |         |         |
|-------------------------------|-------------------|---------|---------|---------|---------|
| Donor                         | Acceptor          | TZ      | QZ      | CBS     | $R$ (Å) |
| HBr                           | HCN               | -1.3849 | -1.4160 | -1.4358 | 3.2459  |
| HBr                           | CH <sub>2</sub> S | -2.0516 | -2.1235 | -2.1869 | 3.5617  |
| HBr                           | H <sub>3</sub> N  | -2.1777 | -2.2158 | -2.2630 | 3.1711  |
| HBr                           | H <sub>2</sub> S  | -1.2610 | -1.3118 | -1.3850 | 3.6497  |
| HI                            | H <sub>2</sub> O  | -2.4349 | -2.4892 | -2.5437 | 3.1716  |
| HI                            | CH <sub>2</sub> O | -2.7394 | -2.8288 | -2.9012 | 3.1550  |
| HI                            | HCN               | -2.1656 | -2.2217 | -2.2469 | 3.3079  |
| HI                            | CH <sub>2</sub> S | -2.7576 | -2.8800 | -2.9785 | 3.5957  |
| HI                            | H <sub>3</sub> N  | -3.4603 | -3.5322 | -3.5956 | 3.1870  |
| HI                            | H <sub>2</sub> S  | -1.8085 | -1.8954 | -1.9960 | 3.7103  |
| I <sub>2</sub>                | H <sub>2</sub> O  | -4.1494 | -4.2639 | -4.3428 | 2.9328  |
| I <sub>2</sub>                | CH <sub>2</sub> O | -4.5490 | -4.6960 | -4.7586 | 2.9026  |
| I <sub>2</sub>                | HCN               | -3.8630 | -3.9756 | -4.0238 | 3.0358  |
| I <sub>2</sub>                | CH <sub>2</sub> S | -6.0726 | -6.3194 | -6.4631 | 3.1096  |
| I <sub>2</sub>                | H <sub>3</sub> N  | -7.8713 | -8.0852 | -8.1777 | 2.7577  |
| I <sub>2</sub>                | H <sub>2</sub> S  | -3.8799 | -4.0572 | -4.2030 | 3.3021  |

Table S3: Benchmark interaction energies and intermolecular separations for all complexes in the validation set, calculated at the CCSD(T)-F12b level, using VnZ-(PP)-F12 basis sets with  $n = \text{T, Q}$ , then extrapolated to the complete basis set (CBS) limit.

| Donor              | Acceptor                      | Interaction energy (kcal/mol) |          |          | $R$ (Å) |
|--------------------|-------------------------------|-------------------------------|----------|----------|---------|
|                    |                               | TZ                            | QZ       | CBS      |         |
| Br <sub>2</sub>    | CH <sub>3</sub> OH            | -5.0287                       | -5.1541  | -5.2323  | 2.6899  |
| Br <sub>2</sub>    | C <sub>2</sub> H <sub>4</sub> | -3.7104                       | -3.8254  | -3.9146  | 2.9910  |
| Br <sub>2</sub>    | Oxirane                       | -5.6765                       | -5.8206  | -5.8875  | 2.6500  |
| Br <sub>2</sub>    | Thiirane                      | -8.2632                       | -8.5190  | -8.6439  | 2.8300  |
| Br <sub>2</sub>    | PH <sub>3</sub>               | -4.6340                       | -4.8342  | -4.9656  | 2.9931  |
| BrI                | CH <sub>3</sub> OH            | -7.1368                       | -7.3433  | -7.4563  | 2.7176  |
| BrI                | C <sub>2</sub> H <sub>4</sub> | -5.1315                       | -5.3210  | -5.4264  | 3.0297  |
| BrI                | Oxirane                       | -7.8167                       | -8.0455  | -8.1642  | 2.6800  |
| BrI                | Thiirane                      | -10.6422                      | -10.9888 | -11.1907 | 2.9200  |
| BrI                | PH <sub>3</sub>               | -7.3208                       | -7.6582  | -7.8735  | 2.9785  |
| CF <sub>3</sub> Br | H <sub>2</sub> O              | -2.9002                       | -2.9924  | -3.0885  | 2.9805  |
| CF <sub>3</sub> Br | CH <sub>2</sub> O             | -3.0021                       | -3.1036  | -3.1522  | 2.9529  |
| CF <sub>3</sub> Br | HCN                           | -2.7189                       | -2.8343  | -2.9039  | 3.0909  |
| CF <sub>3</sub> Br | CH <sub>2</sub> S             | -2.8829                       | -2.9214  | -2.9566  | 3.3642  |
| CF <sub>3</sub> Br | H <sub>3</sub> N              | -4.1070                       | -4.2079  | -4.2452  | 2.9761  |
| CF <sub>3</sub> Br | H <sub>2</sub> S              | -2.0900                       | -2.1329  | -2.1385  | 3.4972  |
| CF <sub>3</sub> Cl | H <sub>2</sub> O              | -2.0648                       | -2.1000  | -2.1304  | 2.9740  |
| CF <sub>3</sub> Cl | CH <sub>2</sub> O             | -2.1391                       | -2.1968  | -2.2315  | 2.9761  |
| CF <sub>3</sub> Cl | HCN                           | -1.9093                       | -1.9962  | -1.9845  | 3.1199  |
| CF <sub>3</sub> Cl | CH <sub>2</sub> S             | -1.9582                       | -1.9971  | -1.9935  | 3.4216  |
| CF <sub>3</sub> Cl | H <sub>3</sub> N              | -2.6339                       | -2.7442  | -2.7958  | 3.0638  |
| CF <sub>3</sub> Cl | H <sub>2</sub> S              | -1.3055                       | -1.3335  | -1.3303  | 3.5215  |

| Donor             | Acceptor                      | Interaction energy (kcal/mol) |          |          | $R$ (Å) |
|-------------------|-------------------------------|-------------------------------|----------|----------|---------|
|                   |                               | TZ                            | QZ       | CBS      |         |
| CF <sub>3</sub> I | H <sub>2</sub> O              | -3.8391                       | -3.9324  | -4.0488  | 3.0373  |
| CF <sub>3</sub> I | CH <sub>2</sub> O             | -3.9364                       | -4.0559  | -4.1539  | 3.0070  |
| CF <sub>3</sub> I | HCN                           | -3.6191                       | -3.6620  | -3.7221  | 3.1466  |
| CF <sub>3</sub> I | CH <sub>2</sub> S             | -3.9782                       | -4.0395  | -4.1556  | 3.3727  |
| CF <sub>3</sub> I | H <sub>3</sub> N              | -5.9030                       | -6.0767  | -6.0802  | 2.9755  |
| CF <sub>3</sub> I | H <sub>2</sub> S              | -2.8629                       | -2.9587  | -3.0251  | 3.5357  |
| Cl <sub>2</sub>   | H <sub>2</sub> O              | -2.7537                       | -2.8180  | -2.8901  | 2.8129  |
| Cl <sub>2</sub>   | CH <sub>2</sub> O             | -3.1310                       | -3.2206  | -3.3098  | 2.7639  |
| Cl <sub>2</sub>   | HCN                           | -2.5028                       | -2.5669  | -2.6117  | 2.9220  |
| Cl <sub>2</sub>   | CH <sub>2</sub> S             | -3.7399                       | -3.8878  | -4.0147  | 3.0271  |
| Cl <sub>2</sub>   | H <sub>3</sub> N              | -4.7486                       | -4.8782  | -4.9920  | 2.6798  |
| Cl <sub>2</sub>   | H <sub>2</sub> S              | -2.3817                       | -2.4815  | -2.5937  | 3.2143  |
| ClBr              | CH <sub>3</sub> OH            | -6.0779                       | -6.2318  | -6.3677  | 2.6213  |
| ClBr              | C <sub>2</sub> H <sub>4</sub> | -4.4620                       | -4.6038  | -4.7632  | 2.9072  |
| ClBr              | Oxirane                       | -6.7351                       | -6.9074  | -7.0029  | 2.5800  |
| ClBr              | Thiirane                      | -9.8033                       | -10.1132 | -10.2986 | 2.7600  |
| ClBr              | PH <sub>3</sub>               | -6.2842                       | -6.5689  | -6.7874  | 2.8564  |
| ClI               | CH <sub>3</sub> OH            | -8.2494                       | -8.4824  | -8.6225  | 2.6660  |
| ClI               | C <sub>2</sub> H <sub>4</sub> | -6.0967                       | -6.3150  | -6.4556  | 2.9524  |
| ClI               | Oxirane                       | -8.9928                       | -9.2495  | -9.3813  | 2.6300  |
| ClI               | Thiirane                      | -12.1645                      | -12.5513 | -12.7742 | 2.8700  |
| ClI               | PH <sub>3</sub>               | -9.3373                       | -9.7514  | -10.0326 | 2.8795  |
| F <sub>2</sub>    | H <sub>2</sub> O              | -1.1819                       | -1.2099  | -1.1811  | 2.6797  |
| F <sub>2</sub>    | CH <sub>2</sub> O             | -1.3849                       | -1.4208  | -1.3936  | 2.6374  |

| Donor          | Acceptor                      | Interaction energy (kcal/mol) |          |          | $R$ (Å) |
|----------------|-------------------------------|-------------------------------|----------|----------|---------|
|                |                               | TZ                            | QZ       | CBS      |         |
| F <sub>2</sub> | HCN                           | -1.0667                       | -1.0980  | -1.0443  | 2.7864  |
| F <sub>2</sub> | CH <sub>2</sub> S             | -1.4760                       | -1.5378  | -1.3273  | 2.9570  |
| F <sub>2</sub> | H <sub>3</sub> N              | -1.7479                       | -1.8047  | -1.8122  | 2.6465  |
| F <sub>2</sub> | H <sub>2</sub> S              | -0.9219                       | -0.9681  | -0.9196  | 3.1155  |
| FBr            | CH <sub>3</sub> OH            | -10.1710                      | -10.3846 | -10.4893 | 2.4124  |
| FBr            | C <sub>2</sub> H <sub>4</sub> | -8.5519                       | -8.7757  | -8.9776  | 2.5800  |
| FBr            | Oxirane                       | -10.8586                      | -11.0873 | -11.2010 | 2.3900  |
| FBr            | Thiirane                      | -16.5434                      | -16.9315 | -17.1503 | 2.5600  |
| FBr            | PH <sub>3</sub>               | -17.7896                      | -18.3404 | -18.6330 | 2.4275  |
| FCI            | CH <sub>3</sub> OH            | -6.7744                       | -6.9431  | -7.0366  | 2.4309  |
| FCI            | C <sub>2</sub> H <sub>4</sub> | -4.7305                       | -4.8832  | -4.9648  | 2.7090  |
| FCI            | Oxirane                       | -7.5136                       | -7.7026  | -7.7848  | 2.3900  |
| FCI            | Thiirane                      | -12.5737                      | -12.9532 | -13.1533 | 2.4800  |
| FCI            | PH <sub>3</sub>               | -19.4629                      | -20.1680 | -20.5098 | 2.1836  |
| FI             | CH <sub>3</sub> OH            | -11.6800                      | -11.9266 | -12.0636 | 2.5342  |
| FI             | C <sub>2</sub> H <sub>4</sub> | -9.8331                       | -10.0767 | -10.2350 | 2.7230  |
| FI             | Oxirane                       | -12.4674                      | -12.6461 | -12.7146 | 2.5100  |
| FI             | Thiirane                      | -16.6852                      | -17.0694 | -17.3095 | 2.7600  |
| FI             | PH <sub>3</sub>               | -15.7366                      | -16.2000 | -16.4779 | 2.6932  |
| HBr            | CH <sub>3</sub> OH            | -2.1593                       | -2.2142  | -2.2589  | 3.0800  |
| HBr            | C <sub>2</sub> H <sub>4</sub> | -1.3662                       | -1.4131  | -1.4593  | 3.4907  |
| HBr            | Oxirane                       | -2.6990                       | -2.7682  | -2.7953  | 3.0500  |
| HBr            | Thiirane                      | -2.7476                       | -2.8322  | -2.8858  | 3.5100  |
| HBr            | PH <sub>3</sub>               | -1.1722                       | -1.2197  | -1.2824  | 3.7351  |

| Interaction energy (kcal/mol) |                               |         |         |         |         |
|-------------------------------|-------------------------------|---------|---------|---------|---------|
| Donor                         | Acceptor                      | TZ      | QZ      | CBS     | $R$ (Å) |
| HI                            | CH <sub>3</sub> OH            | -3.0784 | -3.1681 | -3.2477 | 3.1139  |
| HI                            | C <sub>2</sub> H <sub>4</sub> | -0.8654 | -1.9653 | -2.0276 | 3.5646  |
| HI                            | Oxirane                       | -3.6338 | -3.7440 | -3.7930 | 3.0900  |
| HI                            | Thiirane                      | -3.6600 | -3.8012 | -3.8874 | 3.5400  |
| HI                            | PH <sub>3</sub>               | -1.7449 | -1.8277 | -1.9236 | 3.7794  |
| I <sub>2</sub>                | CH <sub>3</sub> OH            | -5.4471 | -5.6118 | -5.6749 | 2.8300  |
| I <sub>2</sub>                | C <sub>2</sub> H <sub>4</sub> | -3.7945 | -3.9458 | -4.0294 | 3.1767  |
| I <sub>2</sub>                | Oxirane                       | -6.1282 | -6.3174 | -6.4275 | 2.7900  |
| I <sub>2</sub>                | Thiirane                      | -8.1057 | -8.3927 | -8.5773 | 3.0300  |
| I <sub>2</sub>                | PH <sub>3</sub>               | -4.6140 | -4.8402 | -5.0019 | 3.2075  |

## 4 DFT results for all systems

Table S4: Interaction energies and intermolecular separations for all complexes in the fitting and validation sets, calculated using the M06-2X and  $\omega$ B97xD density functionals with the aVTZ(-PP) basis set. The CCSD(T)-F12b/CBS benchmarks are shown for comparison.

| Donor           | Acceptor                      | Interaction energy (kcal/mol) |          |                | $R$ (Å) |        |                |
|-----------------|-------------------------------|-------------------------------|----------|----------------|---------|--------|----------------|
|                 |                               | CBS                           | M06-2X   | $\omega$ B97xD | CBS     | M06-2X | $\omega$ B97xD |
| Br <sub>2</sub> | H <sub>2</sub> O              | -3.9921                       | -4.2000  | -3.7100        | 2.7918  | 2.7805 | 2.7901         |
| Br <sub>2</sub> | CH <sub>2</sub> O             | -4.4417                       | -4.4500  | -3.7300        | 2.7498  | 2.7530 | 2.7735         |
| Br <sub>2</sub> | HCN                           | -3.6564                       | -3.4300  | -3.0200        | 2.8888  | 2.8729 | 2.8976         |
| Br <sub>2</sub> | CH <sub>2</sub> S             | -6.4191                       | -6.5800  | -5.6100        | 2.9106  | 2.9178 | 2.9789         |
| Br <sub>2</sub> | H <sub>3</sub> N              | -7.8103                       | -7.6700  | -7.8400        | 2.5978  | 2.6329 | 2.6378         |
| Br <sub>2</sub> | H <sub>2</sub> S              | -4.0340                       | -4.2800  | -3.6400        | 3.1139  | 3.1316 | 3.1568         |
| Br <sub>2</sub> | CH <sub>3</sub> OH            | -5.2323                       | -5.1300  | -4.6600        | 2.6899  | 2.7205 | 2.7233         |
| Br <sub>2</sub> | C <sub>2</sub> H <sub>4</sub> | -3.9146                       | -4.3000  | -3.6300        | 2.9910  | 2.9959 | 3.0504         |
| Br <sub>2</sub> | Oxirane                       | -5.8875                       | -5.4200  | -4.7800        | 2.6500  | 2.7040 | 2.7077         |
| Br <sub>2</sub> | Thiirane                      | -8.6439                       | -8.4600  | -7.1800        | 2.8300  | 2.8381 | 2.9241         |
| Br <sub>2</sub> | PH <sub>3</sub>               | -4.9656                       | -5.3100  | -4.5300        | 2.9931  | 2.9420 | 3.0312         |
| BrI             | H <sub>2</sub> O              | -5.6662                       | -6.2300  | -5.5900        | 2.8270  | 2.8218 | 2.8366         |
| BrI             | CH <sub>2</sub> O             | -6.1818                       | -6.3600  | -5.5900        | 2.7870  | 2.8002 | 2.8169         |
| BrI             | HCN                           | -5.3502                       | -5.4200  | -4.9500        | 2.9059  | 2.9074 | 2.9019         |
| BrI             | CH <sub>2</sub> S             | -8.7127                       | -8.6200  | -7.8600        | 2.9786  | 2.9778 | 3.0380         |
| BrI             | H <sub>3</sub> N              | -11.0522                      | -11.0400 | -11.0700       | 2.6468  | 2.6644 | 2.6953         |
| BrI             | H <sub>2</sub> S              | -5.6757                       | -5.7700  | -5.2600        | 3.1616  | 3.2015 | 3.2249         |
| BrI             | CH <sub>3</sub> OH            | -7.4563                       | -7.4800  | -6.9100        | 2.7176  | 2.7446 | 2.7622         |
| BrI             | C <sub>2</sub> H <sub>4</sub> | -5.4264                       | -5.8300  | -5.2600        | 3.0297  | 3.0698 | 3.1134         |
| BrI             | Oxirane                       | -8.1642                       | -7.6800  | -7.0300        | 2.6800  | 2.7317 | 2.7476         |

| Donor              | Acceptor          | Interaction energy (kcal/mol) |          |                | $R$ (Å) |        |                |
|--------------------|-------------------|-------------------------------|----------|----------------|---------|--------|----------------|
|                    |                   | CBS                           | M06-2X   | $\omega$ B97xD | CBS     | M06-2X | $\omega$ B97xD |
| BrI                | Thiirane          | -11.1907                      | -10.6800 | -9.7200        | 2.9200  | 2.9356 | 3.0100         |
| BrI                | PH <sub>3</sub>   | -7.8735                       | -8.0800  | -7.2000        | 2.9785  | 2.9377 | 3.0494         |
| CF <sub>3</sub> Br | H <sub>2</sub> O  | -3.0885                       | -2.9900  | -2.4000        | 2.9805  | 2.9167 | 3.0023         |
| CF <sub>3</sub> Br | CH <sub>2</sub> O | -3.1522                       | -3.0700  | -2.3600        | 2.9529  | 2.9224 | 3.0086         |
| CF <sub>3</sub> Br | HCN               | -2.9039                       | -2.4700  | -2.1000        | 3.0909  | 3.0545 | 3.1542         |
| CF <sub>3</sub> Br | CH <sub>2</sub> S | -2.9566                       | -3.0700  | -2.4600        | 3.3642  | 3.3500 | 3.4420         |
| CF <sub>3</sub> Br | H <sub>3</sub> N  | -4.2452                       | -4.1600  | -3.9700        | 2.9761  | 2.9626 | 2.9862         |
| CF <sub>3</sub> Br | H <sub>2</sub> S  | -2.1385                       | -2.0900  | -1.7600        | 3.4972  | 3.4370 | 3.5675         |
| CF <sub>3</sub> Cl | H <sub>2</sub> O  | -2.1304                       | -1.9100  | -1.2900        | 2.9740  | 2.9336 | 3.1213         |
| CF <sub>3</sub> Cl | CH <sub>2</sub> O | -2.2315                       | -2.0700  | -1.3500        | 2.9761  | 2.9184 | 3.1270         |
| CF <sub>3</sub> Cl | HCN               | -1.9845                       | -1.5400  | -1.1600        | 3.1199  | 3.1269 | 3.1199         |
| CF <sub>3</sub> Cl | CH <sub>2</sub> S | -1.9935                       | -1.9700  | -1.3900        | 3.4216  | 3.3851 | 3.5588         |
| CF <sub>3</sub> Cl | H <sub>3</sub> N  | -2.7958                       | -2.5100  | -1.8800        | 3.0638  | 3.0491 | 3.0799         |
| CF <sub>3</sub> Cl | H <sub>2</sub> S  | -1.3303                       | -1.1600  | -0.8700        | 3.5215  | 3.4760 | 3.7571         |
| CF <sub>3</sub> I  | H <sub>2</sub> O  | -4.0488                       | -4.2200  | -3.6000        | 3.0373  | 2.9707 | 3.0462         |
| CF <sub>3</sub> I  | CH <sub>2</sub> O | -4.1539                       | -4.2300  | -3.5100        | 3.0070  | 2.9727 | 3.0480         |
| CF <sub>3</sub> I  | HCN               | -3.7221                       | -3.5400  | -3.1800        | 3.1466  | 3.1103 | 3.1919         |
| CF <sub>3</sub> I  | CH <sub>2</sub> S | -4.1556                       | -4.2900  | -3.7700        | 3.3727  | 3.4175 | 3.4682         |
| CF <sub>3</sub> I  | H <sub>3</sub> N  | -6.0802                       | -6.0900  | -6.0300        | 2.9755  | 2.9781 | 3.0099         |
| CF <sub>3</sub> I  | H <sub>2</sub> S  | -3.0251                       | -2.8100  | -2.6700        | 3.5357  | 3.5224 | 3.5549         |
| Cl <sub>2</sub>    | H <sub>2</sub> O  | -2.8901                       | -3.0000  | -2.3800        | 2.8129  | 2.7676 | 2.7947         |
| Cl <sub>2</sub>    | CH <sub>2</sub> O | -3.3098                       | -3.2800  | -2.4400        | 2.7639  | 2.7480 | 2.7717         |
| Cl <sub>2</sub>    | HCN               | -2.6117                       | -2.3300  | -1.8300        | 2.9220  | 2.8633 | 2.9327         |
| Cl <sub>2</sub>    | CH <sub>2</sub> S | -4.0147                       | -4.3100  | -3.5200        | 3.0271  | 3.0268 | 3.0051         |

| Donor           | Acceptor                      | Interaction energy (kcal/mol) |          |                | $R$ (Å) |        |                |
|-----------------|-------------------------------|-------------------------------|----------|----------------|---------|--------|----------------|
|                 |                               | CBS                           | M06-2X   | $\omega$ B97xD | CBS     | M06-2X | $\omega$ B97xD |
| Cl <sub>2</sub> | H <sub>3</sub> N              | -4.9920                       | -5.1000  | -5.0900        | 2.6798  | 2.6926 | 2.6558         |
| Cl <sub>2</sub> | H <sub>2</sub> S              | -2.5937                       | -2.8400  | -2.1500        | 3.2143  | 3.1358 | 3.1871         |
| ClBr            | H <sub>2</sub> O              | -4.8878                       | -5.1800  | -4.8100        | 2.7210  | 2.7197 | 2.7092         |
| ClBr            | CH <sub>2</sub> O             | -5.3495                       | -5.3800  | -4.8200        | 2.6806  | 2.6973 | 2.6800         |
| ClBr            | HCN                           | -4.5602                       | -4.4100  | -4.1000        | 2.8043  | 2.8018 | 2.7995         |
| ClBr            | CH <sub>2</sub> S             | -7.7604                       | -8.0800  | -7.4200        | 2.8393  | 2.8165 | 2.8632         |
| ClBr            | H <sub>3</sub> N              | -9.7964                       | -9.6100  | -10.2300       | 2.5147  | 2.5416 | 2.5332         |
| ClBr            | H <sub>2</sub> S              | -4.9153                       | -5.1500  | -4.7700        | 3.0396  | 3.0670 | 3.0381         |
| ClBr            | CH <sub>3</sub> OH            | -6.3677                       | -6.2600  | -5.9500        | 2.6213  | 2.6516 | 2.6312         |
| ClBr            | C <sub>2</sub> H <sub>4</sub> | -4.7632                       | -5.1500  | -4.6300        | 2.9072  | 2.9389 | 2.9508         |
| ClBr            | Oxirane                       | -7.0029                       | -6.4800  | -6.0500        | 2.5800  | 2.6317 | 2.6216         |
| ClBr            | Thiirane                      | -10.2986                      | -10.1800 | -9.2800        | 2.7600  | 2.7620 | 2.8173         |
| ClBr            | PH <sub>3</sub>               | -6.7874                       | -8.3300  | -6.9700        | 2.8564  | 2.7056 | 2.8327         |
| ClI             | H <sub>2</sub> O              | -6.6436                       | -7.3500  | -6.7500        | 2.7691  | 2.7653 | 2.7711         |
| ClI             | CH <sub>2</sub> O             | -7.1863                       | -7.4600  | -6.7800        | 2.7284  | 2.7429 | 2.7430         |
| ClI             | HCN                           | -6.4094                       | -6.5700  | -6.1800        | 2.8244  | 2.8366 | 2.8244         |
| ClI             | CH <sub>2</sub> S             | -10.1441                      | -10.1600 | -9.6600        | 2.9202  | 2.9130 | 2.9593         |
| ClI             | H <sub>3</sub> N              | -12.9422                      | -13.0100 | -13.3000       | 2.5984  | 2.6076 | 2.6272         |
| ClI             | H <sub>2</sub> S              | -6.6566                       | -6.7700  | -6.5100        | 3.1017  | 3.1446 | 3.1142         |
| ClI             | CH <sub>3</sub> OH            | -8.6225                       | -8.7600  | -8.2900        | 2.6660  | 2.6900 | 2.6948         |
| ClI             | C <sub>2</sub> H <sub>4</sub> | -6.4556                       | -6.8400  | -6.4000        | 2.9524  | 3.0116 | 3.0287         |
| ClI             | Oxirane                       | -9.3813                       | -8.9300  | -8.3800        | 2.6300  | 2.6815 | 2.6847         |
| ClI             | Thiirane                      | -12.7742                      | -12.2800 | -11.6400       | 2.8700  | 2.8853 | 2.9360         |
| ClI             | PH <sub>3</sub>               | -10.0326                      | -10.1800 | -9.7600        | 2.8795  | 2.8555 | 2.9071         |

| Donor          | Acceptor                      | Interaction energy (kcal/mol) |          |                | $R$ (Å) |        |                |
|----------------|-------------------------------|-------------------------------|----------|----------------|---------|--------|----------------|
|                |                               | CBS                           | M06-2X   | $\omega$ B97xD | CBS     | M06-2X | $\omega$ B97xD |
| F <sub>2</sub> | H <sub>2</sub> O              | -1.1811                       | -0.9100  | -0.5300        | 2.6797  | 2.7640 | 2.9669         |
| F <sub>2</sub> | CH <sub>2</sub> O             | -1.3936                       | -1.1800  | -0.5900        | 2.6374  | 2.6896 | 2.9039         |
| F <sub>2</sub> | HCN                           | -1.0443                       | -0.6800  | -0.4500        | 2.7864  | 2.8142 | 3.2600         |
| F <sub>2</sub> | CH <sub>2</sub> S             | -1.3273                       | -1.7200  | -1.1600        | 2.9570  | 2.8565 | 2.8556         |
| F <sub>2</sub> | H <sub>3</sub> N              | -1.8122                       | -1.5400  | -1.3900        | 2.6465  | 2.5976 | 2.5858         |
| F <sub>2</sub> | H <sub>2</sub> S              | -0.9196                       | -0.9200  | -0.4400        | 3.1155  | 3.0288 | 3.4271         |
| FBr            | H <sub>2</sub> O              | -8.0540                       | -8.6600  | -8.1900        | 2.5098  | 2.5262 | 2.5055         |
| FBr            | CH <sub>2</sub> O             | -8.6728                       | -9.0100  | -8.4600        | 2.4727  | 2.4896 | 2.4560         |
| FBr            | HCN                           | -7.7957                       | -7.9200  | -7.6000        | 2.5351  | 2.5657 | 2.5216         |
| FBr            | CH <sub>2</sub> S             | -14.3436                      | -14.9500 | -14.3400       | 2.5672  | 2.5567 | 2.5763         |
| FBr            | H <sub>3</sub> N              | -16.6741                      | -17.0400 | -17.1900       | 2.3288  | 2.3210 | 2.3510         |
| FBr            | H <sub>2</sub> S              | -9.0320                       | -9.3500  | -9.0000        | 2.7558  | 2.7542 | 2.7806         |
| FBr            | CH <sub>3</sub> OH            | -10.4893                      | -10.4500 | -10.1000       | 2.4124  | 2.4550 | 2.4254         |
| FBr            | C <sub>2</sub> H <sub>4</sub> | -8.9776                       | -9.2000  | -8.8400        | 2.5800  | 2.6370 | 2.6435         |
| FBr            | Oxirane                       | -11.2010                      | -10.5800 | -10.1500       | 2.3900  | 2.4395 | 2.4150         |
| FBr            | Thiirane                      | -17.1503                      | -16.9600 | -16.2400       | 2.5600  | 2.5723 | 2.5934         |
| FBr            | PH <sub>3</sub>               | -18.6330                      | -18.4800 | -18.0400       | 2.4275  | 2.4578 | 2.4615         |
| FCI            | H <sub>2</sub> O              | -5.3642                       | -5.7300  | -5.1400        | 2.5436  | 2.5486 | 2.5295         |
| FCI            | CH <sub>2</sub> O             | -5.8504                       | -6.0600  | -5.3300        | 2.5009  | 2.5095 | 2.4808         |
| FCI            | HCN                           | -4.8186                       | -4.8500  | -4.1900        | 2.6361  | 2.6382 | 2.6114         |
| FCI            | CH <sub>2</sub> S             | -9.7814                       | -9.5300  | -9.9300        | 2.5432  | 2.5829 | 2.5635         |
| FCI            | H <sub>3</sub> N              | -11.6510                      | -11.2800 | -12.1600       | 2.2979  | 2.3276 | 2.3175         |
| FCI            | H <sub>2</sub> S              | -5.3684                       | -5.6100  | -5.4000        | 2.8153  | 2.8998 | 2.8280         |
| FCI            | CH <sub>3</sub> OH            | -7.0366                       | -7.0000  | -6.4800        | 2.4309  | 2.4760 | 2.4473         |

| Donor | Acceptor                      | Interaction energy (kcal/mol) |          |                | $R$ (Å) |        |                |
|-------|-------------------------------|-------------------------------|----------|----------------|---------|--------|----------------|
|       |                               | CBS                           | M06-2X   | $\omega$ B97xD | CBS     | M06-2X | $\omega$ B97xD |
| FCl   | C <sub>2</sub> H <sub>4</sub> | -4.9648                       | -5.4900  | -4.9200        | 2.7090  | 2.7716 | 2.7314         |
| FCl   | Oxirane                       | -7.7848                       | -7.2500  | -6.6300        | 2.3900  | 2.4637 | 2.4254         |
| FCl   | Thiirane                      | -13.1533                      | -11.9700 | -12.1600       | 2.4800  | 2.5462 | 2.5370         |
| FCl   | PH <sub>3</sub>               | -20.5098                      | -12.5900 | -15.3900       | 2.1836  | 2.4017 | 2.3239         |
| FI    | H <sub>2</sub> O              | -9.4488                       | -10.6100 | -9.6300        | 2.6238  | 2.6296 | 2.6323         |
| FI    | CH <sub>2</sub> O             | -10.1249                      | -10.8400 | -9.8200        | 2.5856  | 2.5881 | 2.5935         |
| FI    | HCN                           | -9.5521                       | -10.1300 | -9.4900        | 2.6203  | 2.6421 | 2.6135         |
| FI    | CH <sub>2</sub> S             | -14.7128                      | -14.8300 | -14.4900       | 2.7601  | 2.7534 | 2.7764         |
| FI    | H <sub>3</sub> N              | -17.9678                      | -18.5000 | -18.3100       | 2.4910  | 2.4970 | 2.5157         |
| FI    | H <sub>2</sub> S              | -9.9585                       | -10.2400 | -9.8600        | 2.9236  | 2.9413 | 2.9587         |
| FI    | CH <sub>3</sub> OH            | -12.0636                      | -12.5900 | -11.6600       | 2.5342  | 2.5545 | 2.5678         |
| FI    | C <sub>2</sub> H <sub>4</sub> | -10.2350                      | -10.7600 | -10.0700       | 2.7230  | 2.7539 | 2.7845         |
| FI    | Oxirane                       | -12.7146                      | -12.6300 | -11.7300       | 2.5100  | 2.5392 | 2.5599         |
| FI    | Thiirane                      | -17.3095                      | -16.9900 | -16.3700       | 2.7600  | 2.7675 | 2.7964         |
| FI    | PH <sub>3</sub>               | -16.4779                      | -16.7100 | -16.3600       | 2.6932  | 2.6910 | 2.7069         |
| HBr   | H <sub>2</sub> O              | -1.6863                       | -1.6400  | -1.3500        | 3.1170  | 3.0990 | 3.1837         |
| HBr   | CH <sub>2</sub> O             | -2.1098                       | -2.1100  | -1.5000        | 3.1073  | 3.0373 | 3.2076         |
| HBr   | HCN                           | -1.4358                       | -1.1200  | -0.9500        | 3.2459  | 3.2292 | 3.3407         |
| HBr   | CH <sub>2</sub> S             | -2.1869                       | -2.1500  | -1.6500        | 3.5617  | 3.4726 | 3.6390         |
| HBr   | H <sub>3</sub> N              | -2.2630                       | -2.2100  | -2.1400        | 3.1711  | 3.1390 | 3.1610         |
| HBr   | H <sub>2</sub> S              | -1.3850                       | -1.2900  | -1.0600        | 3.6497  | 3.5685 | 3.7291         |
| HBr   | CH <sub>3</sub> OH            | -2.2589                       | -2.2100  | -1.7800        | 3.0800  | 3.0420 | 3.1518         |
| HBr   | C <sub>2</sub> H <sub>4</sub> | -1.4593                       | -1.3900  | -1.3100        | 3.4907  | 3.3660 | 3.5608         |
| HBr   | Oxirane                       | -2.7953                       | -2.7900  | -2.0700        | 3.0500  | 2.9803 | 3.1519         |

| Donor          | Acceptor                      | Interaction energy (kcal/mol) |         |                | $R$ (Å) |        |                |
|----------------|-------------------------------|-------------------------------|---------|----------------|---------|--------|----------------|
|                |                               | CBS                           | M06-2X  | $\omega$ B97xD | CBS     | M06-2X | $\omega$ B97xD |
| HBr            | Thiirane                      | -2.8858                       | -3.0000 | -2.2900        | 3.5100  | 3.4367 | 3.5847         |
| HBr            | PH <sub>3</sub>               | -1.2824                       | -1.0400 | -0.9700        | 3.7351  | 3.6220 | 3.8136         |
| HI             | H <sub>2</sub> O              | -2.5437                       | -2.6000 | -2.3300        | 3.1716  | 3.1078 | 3.2275         |
| HI             | CH <sub>2</sub> O             | -2.9012                       | -2.9200 | -2.3900        | 3.1550  | 3.1085 | 3.2429         |
| HI             | HCN                           | -2.2469                       | -2.0100 | -1.9000        | 3.3079  | 3.2749 | 3.3323         |
| HI             | CH <sub>2</sub> S             | -2.9785                       | -2.9900 | -2.5700        | 3.5957  | 3.5526 | 3.6615         |
| HI             | H <sub>3</sub> N              | -3.5956                       | -3.5600 | -3.7200        | 3.1870  | 3.1914 | 3.2087         |
| HI             | H <sub>2</sub> S              | -1.9960                       | -1.9200 | -1.8100        | 3.7103  | 3.6288 | 3.7578         |
| HI             | CH <sub>3</sub> OH            | -3.2477                       | -3.2500 | -2.9200        | 3.1139  | 3.0720 | 3.1494         |
| HI             | C <sub>2</sub> H <sub>4</sub> | -2.0276                       | -2.0900 | -2.1100        | 3.5646  | 3.4740 | 3.6015         |
| HI             | Oxirane                       | -3.7930                       | -3.7200 | -3.1900        | 3.0900  | 3.0375 | 3.1435         |
| HI             | Thiirane                      | -3.8874                       | -3.9600 | -3.4400        | 3.5400  | 3.5377 | 3.6203         |
| HI             | PH <sub>3</sub>               | -1.9236                       | -1.7200 | -1.7600        | 3.7794  | 3.6918 | 3.8325         |
| I <sub>2</sub> | H <sub>2</sub> O              | -4.3428                       | -4.7700 | -4.2200        | 2.9328  | 2.9053 | 2.9364         |
| I <sub>2</sub> | CH <sub>2</sub> O             | -4.7586                       | -4.9200 | -4.2100        | 2.9026  | 2.8896 | 2.9288         |
| I <sub>2</sub> | HCN                           | -4.0238                       | -3.9600 | -3.5900        | 3.0358  | 2.9992 | 3.0453         |
| I <sub>2</sub> | CH <sub>2</sub> S             | -6.4631                       | -6.3800 | -5.6800        | 3.1096  | 3.1377 | 3.1994         |
| I <sub>2</sub> | H <sub>3</sub> N              | -8.1777                       | -8.2200 | -8.3300        | 2.7577  | 2.7830 | 2.7978         |
| I <sub>2</sub> | H <sub>2</sub> S              | -4.2030                       | -4.3300 | -3.8900        | 3.3021  | 3.3225 | 3.3671         |
| I <sub>2</sub> | CH <sub>3</sub> OH            | -5.6749                       | -5.7700 | -5.2900        | 2.8300  | 2.8396 | 2.8578         |
| I <sub>2</sub> | C <sub>2</sub> H <sub>4</sub> | -4.0294                       | -4.4000 | -3.9500        | 3.1767  | 3.1732 | 3.2721         |
| I <sub>2</sub> | Oxirane                       | -6.4275                       | -6.0400 | -5.4600        | 2.7900  | 2.8337 | 2.8503         |
| I <sub>2</sub> | Thiirane                      | -8.5773                       | -8.1000 | -7.3200        | 3.0300  | 3.0676 | 3.1151         |
| I <sub>2</sub> | PH <sub>3</sub>               | -5.0019                       | -4.9300 | -4.5800        | 3.2075  | 3.2227 | 3.2690         |

Table S5: Interaction energies and intermolecular separations for all complexes involving the set of larger molecules, calculated using M06-2X/aVTZ-(PP). The larger molecules comprise the donors C<sub>6</sub>F<sub>5</sub>X, where X is Cl, Br, or I, and the acceptors glycine (Gly), valine (Val), leucine (Leu), and sulphoximine (Sulphox). Also given for the purposes of parametrisation (see the Jupyter notebook) are their interactions with the molecules from the fitting set, calculated at the same level of theory.

| Donor                            | Acceptor          | $E$ (kcal/mol) | $R$ (Å) |
|----------------------------------|-------------------|----------------|---------|
| Br <sub>2</sub>                  | Gly               | -5.1300        | 2.7520  |
| Br <sub>2</sub>                  | Val               | -5.8100        | 2.7510  |
| Br <sub>2</sub>                  | Leu               | -6.4300        | 2.7570  |
| Br <sub>2</sub>                  | Sulphox           | -6.3600        | 2.7740  |
| BrI                              | Gly               | -7.4900        | 2.7780  |
| BrI                              | Val               | -8.3400        | 2.7760  |
| BrI                              | Leu               | -8.8200        | 2.7740  |
| C <sub>6</sub> F <sub>5</sub> Br | H <sub>2</sub> O  | -3.0000        | 2.9030  |
| C <sub>6</sub> F <sub>5</sub> Br | CH <sub>2</sub> O | -3.2300        | 2.9190  |
| C <sub>6</sub> F <sub>5</sub> Br | HCN               | -2.4500        | 3.0400  |
| C <sub>6</sub> F <sub>5</sub> Br | CH <sub>2</sub> S | -3.2900        | 3.3590  |
| C <sub>6</sub> F <sub>5</sub> Br | H <sub>3</sub> N  | -4.1500        | 2.9520  |
| C <sub>6</sub> F <sub>5</sub> Br | H <sub>2</sub> S  | -0.9700        | 3.4960  |
| C <sub>6</sub> F <sub>5</sub> Br | Gly               | -3.6600        | 2.8920  |
| C <sub>6</sub> F <sub>5</sub> Br | Val               | -4.6100        | 2.9010  |
| C <sub>6</sub> F <sub>5</sub> Br | Leu               | -4.9700        | 2.9280  |
| C <sub>6</sub> F <sub>5</sub> Br | Sulphox           | -4.0500        | 2.9980  |
| C <sub>6</sub> F <sub>5</sub> Cl | H <sub>2</sub> O  | -1.7200        | 2.9360  |
| C <sub>6</sub> F <sub>5</sub> Cl | CH <sub>2</sub> O | -2.2200        | 3.0470  |
| C <sub>6</sub> F <sub>5</sub> Cl | HCN               | -1.3400        | 3.1440  |
| C <sub>6</sub> F <sub>5</sub> Cl | CH <sub>2</sub> S | -2.2800        | 3.4020  |

| Donor                            | Acceptor          | $E$ (kcal/mol) | $R$ (Å) |
|----------------------------------|-------------------|----------------|---------|
| C <sub>6</sub> F <sub>5</sub> Cl | H <sub>3</sub> N  | -2.2500        | 3.0540  |
| C <sub>6</sub> F <sub>5</sub> Cl | H <sub>2</sub> S  | -0.5100        | 3.5150  |
| C <sub>6</sub> F <sub>5</sub> Cl | Gly               | -2.4900        | 2.9240  |
| C <sub>6</sub> F <sub>5</sub> Cl | Val               | -3.7500        | 3.1420  |
| C <sub>6</sub> F <sub>5</sub> Cl | Leu               | -5.1200        | 3.1580  |
| C <sub>6</sub> F <sub>5</sub> Cl | Sulphox           | -3.3200        | 3.3180  |
| C <sub>6</sub> F <sub>5</sub> I  | H <sub>2</sub> O  | -4.3600        | 2.9530  |
| C <sub>6</sub> F <sub>5</sub> I  | CH <sub>2</sub> O | -4.4200        | 2.9540  |
| C <sub>6</sub> F <sub>5</sub> I  | HCN               | -3.6600        | 3.0780  |
| C <sub>6</sub> F <sub>5</sub> I  | CH <sub>2</sub> S | -4.4700        | 3.4000  |
| C <sub>6</sub> F <sub>5</sub> I  | H <sub>3</sub> N  | -6.2800        | 2.9640  |
| C <sub>6</sub> F <sub>5</sub> I  | H <sub>2</sub> S  | -1.4400        | 3.5610  |
| C <sub>6</sub> F <sub>5</sub> I  | Gly               | -5.1800        | 2.9440  |
| C <sub>6</sub> F <sub>5</sub> I  | Val               | -6.2200        | 2.9530  |
| C <sub>6</sub> F <sub>5</sub> I  | Leu               | -6.4500        | 2.9590  |
| C <sub>6</sub> F <sub>5</sub> I  | Sulphox           | -5.9600        | 2.9890  |
| ClBr                             | Gly               | -6.3900        | 2.6680  |
| ClBr                             | Val               | -7.1000        | 2.6860  |
| ClBr                             | Leu               | -7.6500        | 2.6700  |
| ClBr                             | Sulphox           | -7.6600        | 2.6750  |
| ClI                              | Gly               | -8.9400        | 2.7060  |
| ClI                              | Val               | -9.7800        | 2.7180  |
| ClI                              | Leu               | -10.2800       | 2.6970  |
| ClI                              | Sulphox           | -10.7800       | 2.6690  |
| FBr                              | Gly               | -10.0800       | 2.4990  |

| Donor          | Acceptor | $E$ (kcal/mol) | $R$ (Å) |
|----------------|----------|----------------|---------|
| FBr            | Val      | -10.8800       | 2.4960  |
| FBr            | Leu      | -11.3100       | 2.4860  |
| FBr            | Sulphox  | -14.2900       | 2.3650  |
| FCl            | Gly      | -6.9300        | 2.5290  |
| FCl            | Val      | -7.6900        | 2.5300  |
| FCl            | Leu      | -8.0900        | 2.5220  |
| FCl            | Sulphox  | -9.6500        | 2.4380  |
| FI             | Gly      | -12.4000       | 2.5880  |
| FI             | Val      | -13.3000       | 2.5800  |
| FI             | Leu      | -13.8200       | 2.5710  |
| FI             | Sulphox  | -16.2700       | 2.5120  |
| HBr            | Gly      | -2.2800        | 3.0380  |
| HBr            | Val      | -3.0100        | 3.1080  |
| HBr            | Leu      | -3.1700        | 3.0460  |
| HBr            | Sulphox  | -3.1500        | 3.2210  |
| HI             | Gly      | -3.3200        | 3.1020  |
| HI             | Val      | -4.1800        | 3.0960  |
| HI             | Leu      | -3.2500        | 3.0860  |
| HI             | Sulphox  | -3.9900        | 3.2720  |
| I <sub>2</sub> | Gly      | -5.8000        | 2.8720  |
| I <sub>2</sub> | Val      | -6.6700        | 2.8830  |
| I <sub>2</sub> | Leu      | -7.0800        | 2.8640  |
| I <sub>2</sub> | Sulphox  | -6.8700        | 2.8960  |

## 5 Additional figures

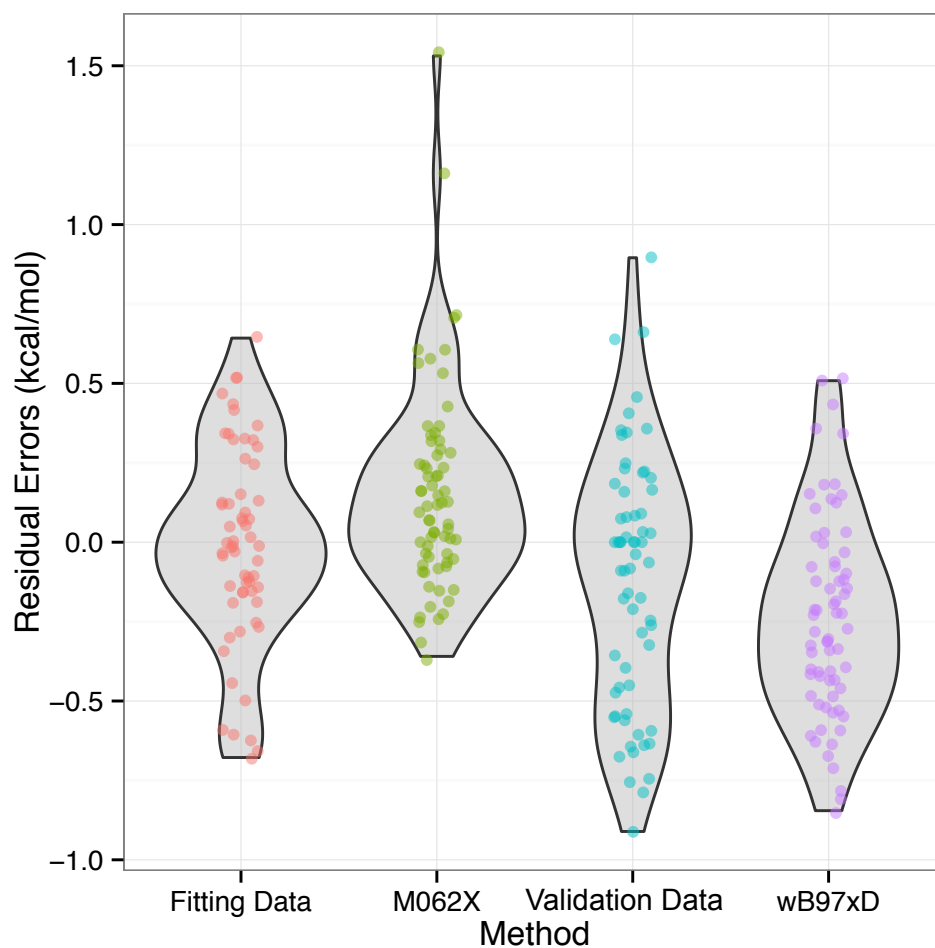

Figure S1: Violin plots of the error distributions of the  $P0$  model, M06-2X/aVTZ, and  $\omega$ B97xD/aVTZ, compared to CCSD(T)-F12b/CBS results. The model is split into data from the fitting and validation sets. The shape of the violin shows where the density of errors is concentrated, such that an ideal distribution would be a very short, wide density centred on the origin.

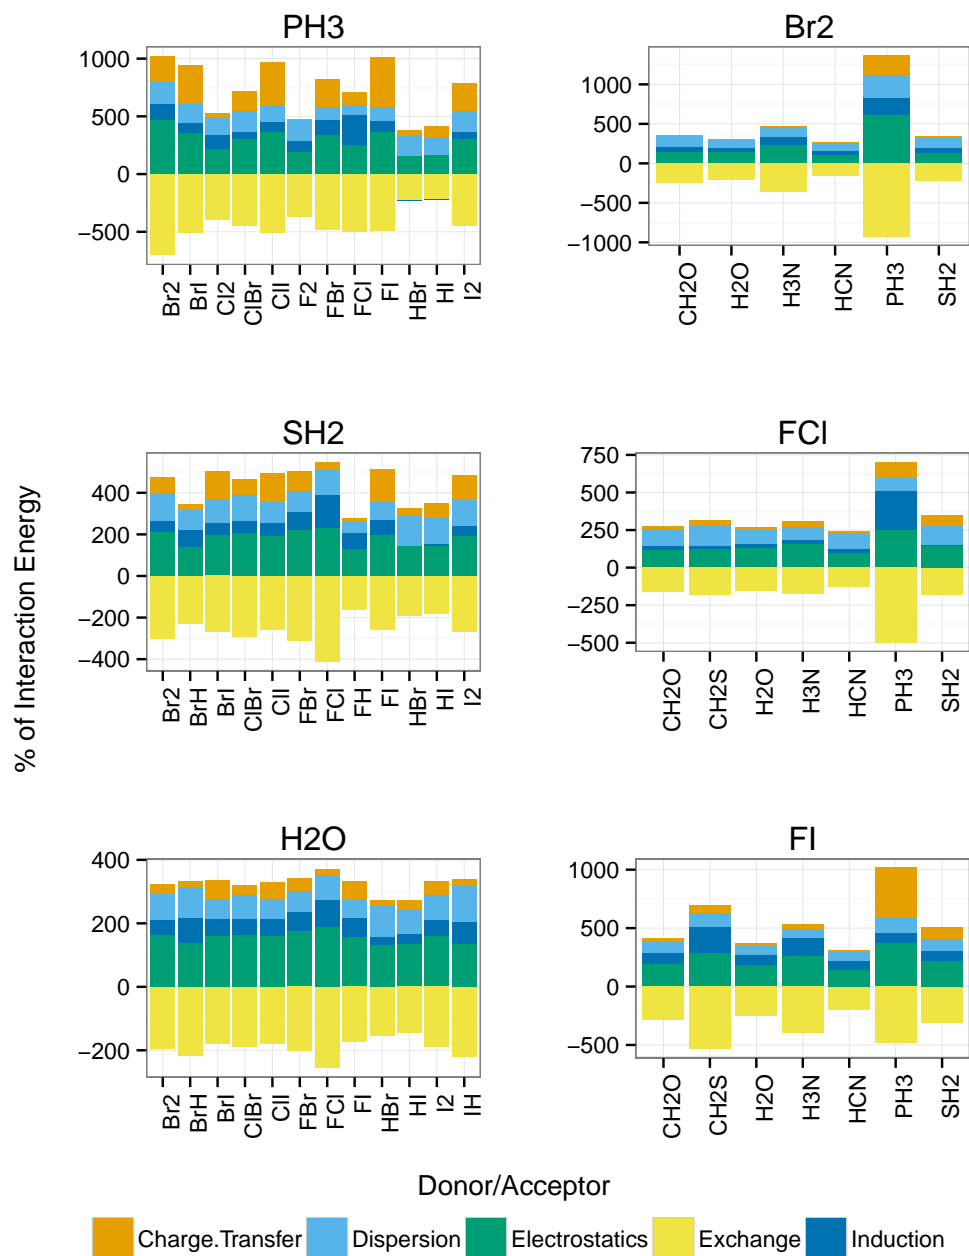

Figure S2: The SAPT decompositions as a percentage relative to the interaction energy, for 3 donors and 3 acceptors. For the right hand column, the percentage charge transfer jumps in all instances for the PH<sub>3</sub> acceptor, particularly in the case of FI. In the left hand column, the charge transfer contributions are far greater for phosphine than for the other two, and those for SH<sub>2</sub> are similarly larger than for H<sub>2</sub>O. The numerical data can be found in the fitting\_set.csv dataset.
